# Supplementary material
Source: HighWire-hosted journal article supplement (https://qdcxjkg.com/highwire/filestream/114464/field_highwire_adjunct_files/1/ERJ-01735-2014_Supp_Figure_S2.pdf)
Supplement: ERJ-01735-2014_Supp_Figure_S2.pdf [file ERJ-01735-2014_Supp_Figure_S2.pdf]

## Supplementary Figure 2

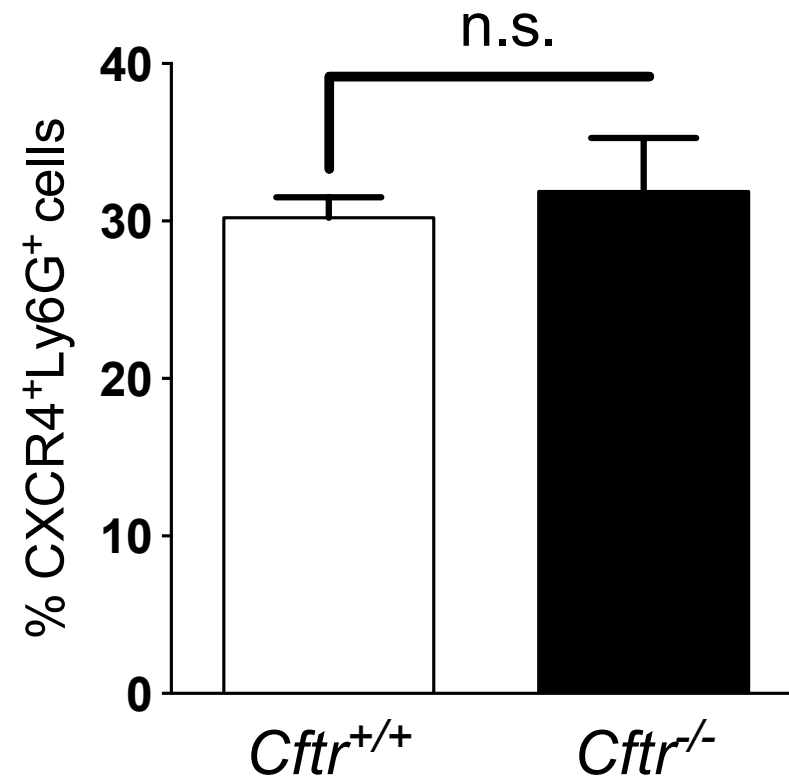

Supplementary Figure 2. CXCR4-expressing neutrophils in *Cftr*<sup>-/-</sup> mice  
CXCR4-expressing neutrophils were quantified in bone-marrow of *Cftr*<sup>-/-</sup> mice (*Cftr*<sup>tm1Unc-Tg(FABPCFTR)</sup>) and age-/strain-matched *Cftr*<sup>+/+</sup> mice. Bars indicate medians with interquartile ranges. n.s. not significant
